# Supplementary material for: Over-expression of microRNA171 affects phase transitions and floral meristem determinancy in barley
Source: PubMed Central journal article supplement (PMC3547705; doi:10.1186/1471-2229-13-6), 2013-01-07
Supplement: 1471-2229-13-6-S1.pdf [file 1471-2229-13-6-S1.pdf]

### A. pri-miR171a (U21\_38648)

```

          10          20          30          40
U      U          U A      C      -      A-|      G      GA
CACUA GAUGUUGGC CG CUCA UCAG ACC  CGCCG AGG  G
GUGUA CUAUAACCG GC GAGU AGUC UGG  GCGGC UCU  C
C      U          U C      U      U      U      CG^      G      AC
          90          80          70          60          50

```

### B. Mature miR171 sequences

|                      |                       |
|----------------------|-----------------------|
| <b>hvu-miR171a</b>   | ugauugagccgugccaauauc |
| <b>hvu-miR171b</b>   | ugauugagccgcgccaauauc |
| <b>ath-miR171a</b>   | ugauugagccgcgccaauauc |
| ath-miR171b/c        | uugagccgugccaauaucacg |
| <b>osa-miR171a</b>   | ugauugagccgcgccaauauc |
| <b>osa-miR171b-f</b> | ugauugagccgugccaauauc |
| osa-miR171g          | gaggugagccgagccaauauc |
| osa-miR171h          | gugagccgaaccaauaucacu |
| osa-miR171i          | ggauugagccgcgucaauauc |

**Additional file 1. miR171 precursor and mature sequences.** Information retrieved from miRBase (release-17) and Schreiber *et al.*, 2011 [34]. (A) *pri-miR171a* secondary structure obtained using MFOLD (<http://mfold.rna.albany.edu>), red letters indicate mature miRNA sequence. (B) mature miR171 sequences found in *Hordeum vulgare* (hvu), *Arabidopsis thaliana* (Ath) and *Oryza sativa* (Osa).
