# Supplementary material for: Over-expression of microRNA171 affects phase transitions and floral meristem determinancy in barley
Source: PubMed Central journal article supplement (PMC3547705; doi:10.1186/1471-2229-13-6), 2013-01-07
Supplement: 1471-2229-13-6-S3.pdf [file 1471-2229-13-6-S3.pdf]

A

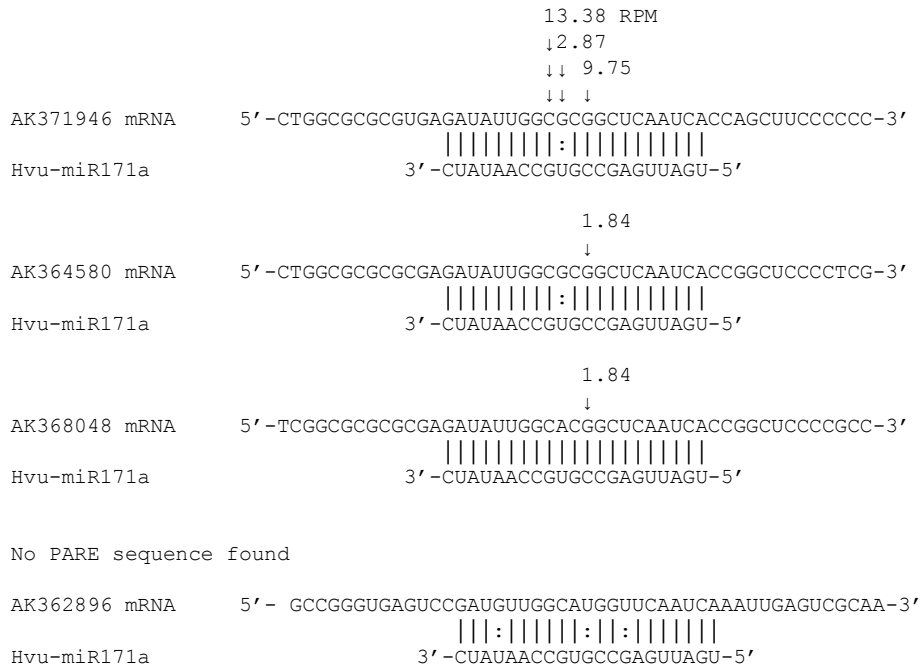

B

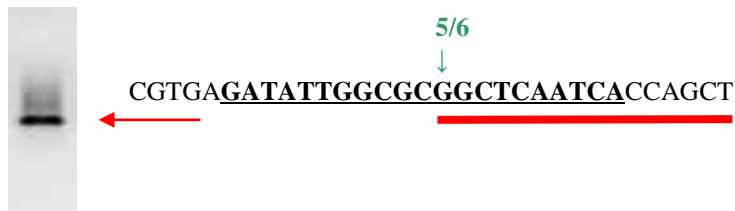

C

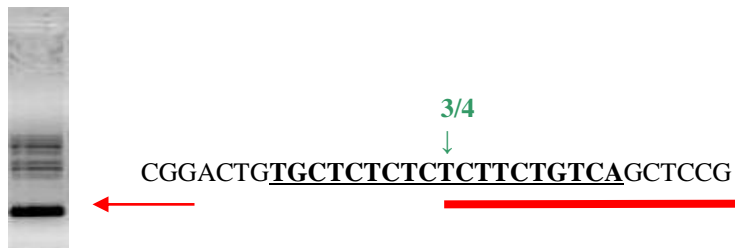

### Additional file 3. Evidence for miR171 cleavage of HvSCLs and HvSPL.

(A) Evidence for cleavage of top four predicted miR171 targets in degradome data from developing barley grains [36] (B) RLM-5' RACE on HvSCL (U21\_33945). (C) RLM-5' RACE on HvSPL (U21\_18637). The miRNA binding site is underlined in black and the 5' end of the cleaved mRNA in red. The numbers in green refer to the ratio of 5'-RACE clones showing a cleavage at the base indicated by the arrow. The agarose gel on the left shows the band corresponding to the amplified 3' cleavage products.
