# Supplementary material for: Over-expression of microRNA171 affects phase transitions and floral meristem determinancy in barley
Source: PubMed Central journal article supplement (PMC3547705; doi:10.1186/1471-2229-13-6), 2013-01-07
Supplement: 1471-2229-13-6-S5.pdf [file 1471-2229-13-6-S5.pdf]

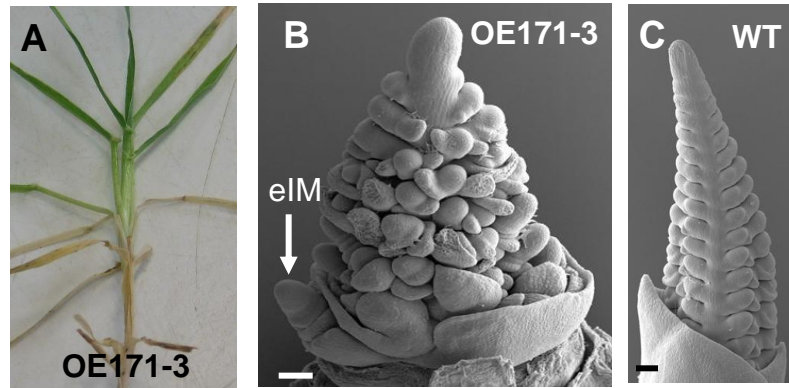

**Additional file 5. Developmental arrest of OE171-3 (T<sub>0</sub>).** (A) Tiller of the T<sub>0</sub> plant OE171-3. Scanning electron microscopy of the SAM of a OE171-3 (B) and WT (C) plants. Ectopic inflorescence meristem (eIM). Scale bars represent 1mm.
