# Supplementary material for: Over-expression of microRNA171 affects phase transitions and floral meristem determinancy in barley
Source: PubMed Central journal article supplement (PMC3547705; doi:10.1186/1471-2229-13-6), 2013-01-07
Supplement: 1471-2229-13-6-S6.pdf [file 1471-2229-13-6-S6.pdf]

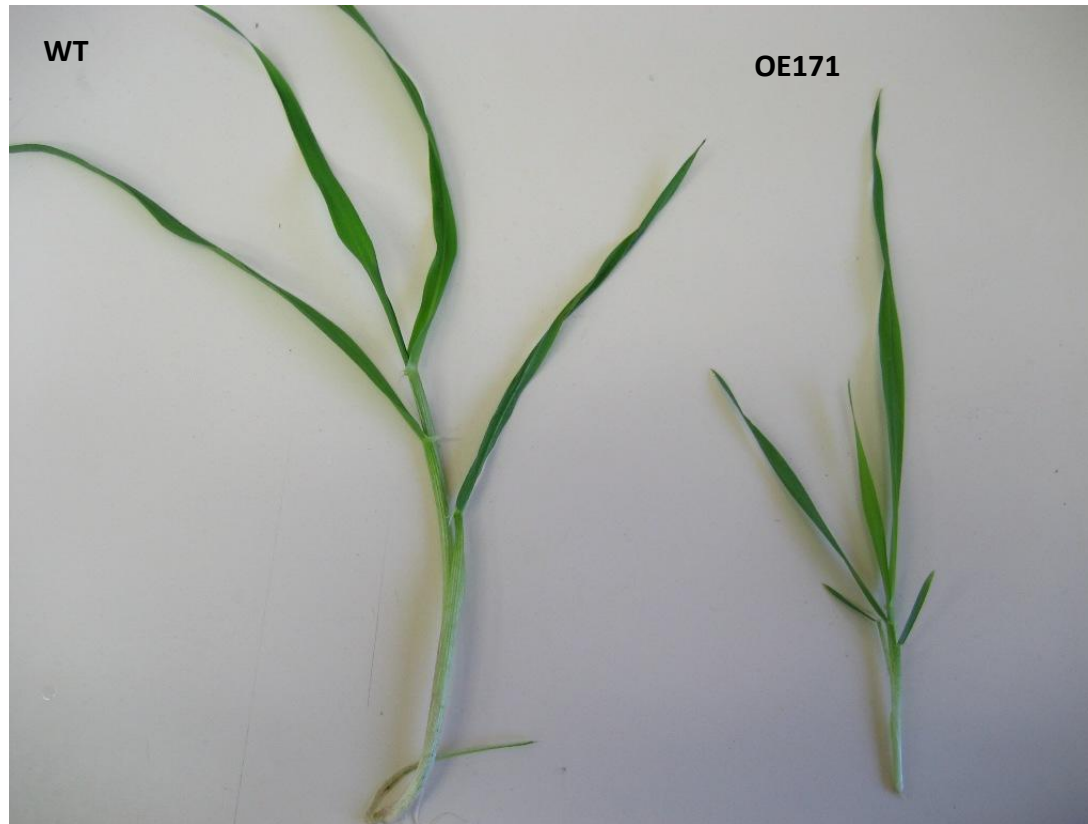

**Additional file 6 (pdf file). Comparison of vegetative WT and OE171 plants.** Representative WT and OE171 plants at 4 weeks old in LD conditions.
