# Supplementary material for: Over-expression of microRNA171 affects phase transitions and floral meristem determinancy in barley
Source: PubMed Central journal article supplement (PMC3547705; doi:10.1186/1471-2229-13-6), 2013-01-07
Supplement: 1471-2229-13-6-S7.pdf [file 1471-2229-13-6-S7.pdf]

### A. pri-miR171a (U21\_38648)

```

          10          20          30          40
U      U          U A    C    -    A-|    G    GA
  CACUA GAUGUUGGC CG CUCA UCAG ACC  CGCCG AGG  G
  GUGUA CUAUAACCG GC GAGU AGUC UGG  GCGGC UCU  C
C      U          U  C    U    U    CG^    G    AC
  90          80          70          60          50

```

### B. Mature miR171 sequences

|                      |                       |
|----------------------|-----------------------|
| <b>hvu-miR171a</b>   | ugauugagccgugccaauauc |
| <b>hvu-miR171b</b>   | ugauugagccgcgccaauauc |
| <b>ath-miR171a</b>   | ugauugagccgcgccaauauc |
| ath-miR171b/c        | uugagccgugccaauaucacg |
| <b>osa-miR171a</b>   | ugauugagccgcgccaauauc |
| <b>osa-miR171b-f</b> | ugauugagccgugccaauauc |
| osa-miR171g          | gaggugagccgagccaauauc |
| osa-miR171h          | gugagccgaaccaauaucacu |
| osa-miR171i          | ggauugagccgcgucaauauc |

**Additional file 1. miR171 precursor and mature sequences.** Information retrieved from miRBase (release-17) and Schreiber *et al.*, 2011 [34]. (A) *pri-miR171a* secondary structure obtained using MFOLD (<http://mfold.rna.albany.edu>), red letters indicate mature miRNA sequence. (B) mature miR171 sequences found in *Hordeum vulgare* (hvu), *Arabidopsis thaliana* (Ath) and *Oryza sativa* (Osa).





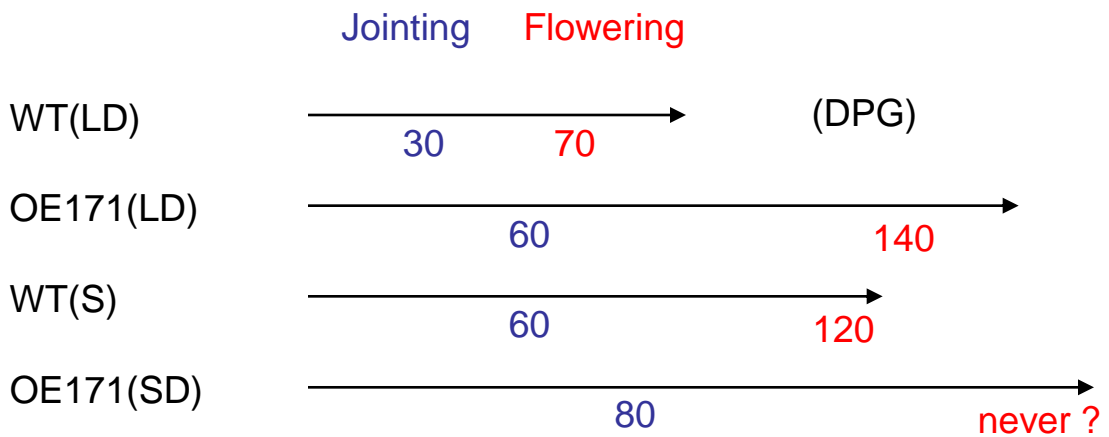

**Additional file 4. Timing of the transition phases during shoot development.** The diagram shows the approximate timing of the transitions from juvenile to adult phases and adult to reproductive phases. The first transition was determined by the moment when the first stem of the plant started to elongate (jointing) and the second transition (flowering) when the first spike reached anthesis. Under our SD condition, OE171 plants did not flower.

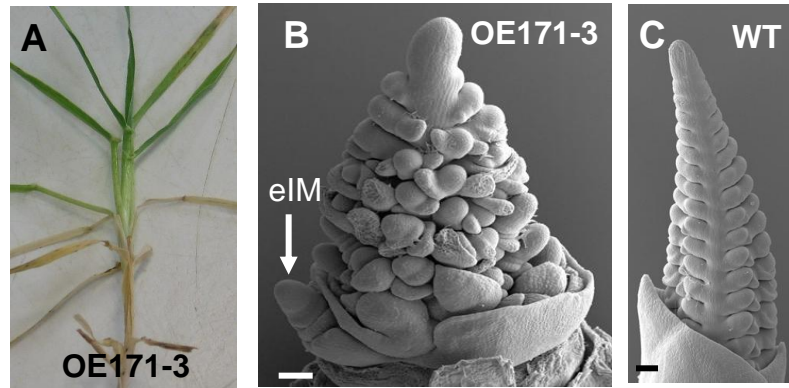

**Additional file 5. Developmental arrest of OE171-3 (T<sub>0</sub>).** (A) Tiller of the T<sub>0</sub> plant OE171-3. Scanning electron microscopy of the SAM of a OE171-3 (B) and WT (C) plants. Ectopic inflorescence meristem (eIM). Scale bars represent 1mm.

| <b>Name</b> | <b>Sequence 5' -3'</b>    | <b>Use for</b> |
|-------------|---------------------------|----------------|
| MIR171-1F   | CACCTTGGTGCTAGAGGCTAGAGAG | Cloning        |
| MIR171-2R   | GATCCGATGATAAAACCCCTTCG   | Cloning        |
| MIR171-3F   | CGGCGGCGGTTCTGATTG        | qPCR           |
| MIR171-4R   | GCGTGCATGAAAGAGCACTAA     | qPCR           |
| SCL-F       | GCGGCTTACAAGTCCTTCTC      | qPCR           |
| SCL-R       | GAAGTTAGCGAACTGCAGCAT     | qPCR           |
| SPL-F       | TTCTCCGATGGTCTGACTCC      | qPCR           |
| SPL-R       | ATTGCTGCAGGTTGGAGAAC      | qPCR           |
| AP2L-F      | TGCAGCCAGAGATCATAGCA      | qPCR           |
| AP2L-R      | GGTTGCTTGACGACGATGAT      | qPCR           |
| TRD-F       | TTAAATAACAGAGCGCCGAGA     | qPCR           |
| TRD-R       | GCTGTGGTCGTCGTAGGAGTA     | qPCR           |
| PLA1-F      | GCTCTGGGAGATGGTGTTC       | qPCR           |
| PLA1-R      | GATGACGGCGTGGAGGTAG       | qPCR           |
| WUS-F       | ACCTTTTGTCTCTCCCTCCAC     | qPCR           |
| WUS-R       | ACATCTCCTCCAGGATCATCA     | qPCR           |
| KN1-F       | TCAAGGAGATGCTGCTCAAGA     | qPCR           |
| KN1-R       | GTAGTGCGTGTTCCACCAGTC     | qPCR           |
| miR171-AS   | GATATTGGCACGGCTCAATCA     | Northern Probe |
| miR156-AS   | GTGCTCACTCTCTTCTGTCA      | Northern Probe |
| miR172-AS   | ATGCAGCATCATCAAGATTCT     | Northern Probe |
| miR168-AS   | GTCCCGATCTGCACCAAGCGA     | Northern Probe |
| SCL-5RACE   | GAGAAGGACTTGTAAGCCGCC     | 5' RACE        |
| SPL-5RACE   | GAGACGGTGCCGGTGGAAGCCT    | 5' RACE        |

**Additional file 7. Primer and Probe sequences used in this study.**
