# Supplementary material for: Over-expression of microRNA171 affects phase transitions and floral meristem determinancy in barley
Source: BMC Plant Biol. 2013 Jan 7;13:6. doi: 10.1186/1471-2229-13-6 (PMC3547705; doi:10.1186/1471-2229-13-6)
Supplement: Additional file 2 — Potential targets of hvu-miR171a and b. psRNAtarget ( http://plantgrn.noble.org/psRNATarget) was used to predict potential targets of hvu-miR171a and b among the full-length barley ESTs assembled by Matsumoto et al., 2011 [35]. The maximum score was set at 4. The column “Activity” refers to the type of inhibition predicted, Cleavage (CL) or Translation inhibition (TR). [file 1471-2229-13-6-S2.pdf]

| Genbank ID      | Homology                       | Score | Sequence Alignment |      |                        |      |                        |    | Activity |
|-----------------|--------------------------------|-------|--------------------|------|------------------------|------|------------------------|----|----------|
| miR171a targets |                                |       |                    |      |                        |      |                        |    |          |
| AK368048        | SCL                            | 0.0   | miRNA              | 21   | CUAUAACCGUGCCGAGUUAGU  | 1    | .....                  | CL |          |
|                 |                                |       | Target             | 932  | GAUAUUGGCACGGCUCAAUCA  | 952  |                        |    |          |
| AK371946        | SCL                            | 0.5   | miRNA              | 21   | CUAUAACCGUGCCGAGUUAGU  | 1    | .....                  | CL |          |
|                 |                                |       | Target             | 1231 | GAUAUUGGCGCGGCUCAAUCA  | 1251 |                        |    |          |
| AK364580        | SCL                            | 0.5   | miRNA              | 21   | CUAUAACCGUGCCGAGUUAGU  | 1    | .....                  | CL |          |
|                 |                                |       | Target             | 616  | GAUAUUGGCGCGGCUCAAUCA  | 636  |                        |    |          |
| AK362896        | Unknown function               | 1.5   | miRNA              | 21   | CUAUAACCGUGCCGAGUUAGU  | 1    | .....                  | CL |          |
|                 |                                |       | Target             | 446  | GAUGUUGGCAUGGUUCAAUCA  | 466  |                        |    |          |
| AK360395        | ATPase                         | 4.0   | miRNA              | 21   | CUAUAACCGUGCCGAGUUAGU  | 1    | ..... : :              | TR |          |
|                 |                                |       | Target             | 926  | UAUGUUGGAGCUGCUCAAUCA  | 946  |                        |    |          |
| AK374235        | WD40                           | 4.0   | miRNA              | 21   | CUAUAACCGUGCCGAGUUAGU  | 1    | .. : : : : : : : : : : | CL |          |
|                 |                                |       | Target             | 959  | CAUGAUGGCAAGGUUCAAUCA  | 979  |                        |    |          |
| AK373446        | Unknown function               | 4.0   | miRNA              | 21   | CUAUAACCGUGCCGAGUUAGU  | 1    | : : : : : : : : : :    | CL |          |
|                 |                                |       | Target             | 1247 | UAGAUUAGCCCCGGCUCAAUCA | 1267 |                        |    |          |
| AK368182        | RNA binding protein            | 4.0   | miRNA              | 21   | CUAUAACCGUGCCGAGUUAGU  | 1    | ..... : : : : : : :    | TR |          |
|                 |                                |       | Target             | 893  | GAUAUUGGCAUGCUUCGCUCA  | 913  |                        |    |          |
| AK252561        | Unknown function               | 4.0   | miRNA              | 21   | CUAUAACCGUGCCGAGUUAGU  | 1    | ..... : : : : : : .    | CL |          |
|                 |                                |       | Target             | 96   | UUUAUUGGCCCGGCUCGAUCG  | 116  |                        |    |          |
| miR171b targets |                                |       |                    |      |                        |      |                        |    |          |
| AK371946        | SCL                            | 0.0   | miRNA              | 21   | CUAUAACCGCGCCGAGUUAGU  | 1    | .....                  | CL |          |
|                 |                                |       | Target             | 1231 | GAUAUUGGCGCGGCUCAAUCA  | 1251 |                        |    |          |
| AK364580        | SCL                            | 0.0   | miRNA              | 21   | CUAUAACCGCGCCGAGUUAGU  | 1    | .....                  | CL |          |
|                 |                                |       | Target             | 616  | GAUAUUGGCGCGGCUCAAUCA  | 636  |                        |    |          |
| AK368048        | SCL                            | 1.0   | miRNA              | 21   | CUAUAACCGCGCCGAGUUAGU  | 1    | ..... : : : : : : :    | CL |          |
|                 |                                |       | Target             | 932  | GAUAUUGGCACGGCUCAAUCA  | 952  |                        |    |          |
| AK362896        | Unknown function               | 2.5   | miRNA              | 21   | CUAUAACCGCGCCGAGUUAGU  | 1    | ..... : : : : : : :    | CL |          |
|                 |                                |       | Target             | 446  | GAUGUUGGCAUGGUUCAAUCA  | 466  |                        |    |          |
| AK360395        | ATPase                         | 3.5   | miRNA              | 21   | CUAUAACCGCGCCGAGUUAGU  | 1    | ..... : : : : : : :    | TR |          |
|                 |                                |       | Target             | 926  | UAUGUUGGAGCUGCUCAAUCA  | 946  |                        |    |          |
| AK248532        | E3 ubiquitin ligase            | 3.5   | miRNA              | 21   | CUAUAACCGCGCCGAGUUAGU  | 1    | ..... : : : : : : :    | TR |          |
|                 |                                |       | Target             | 164  | GAUAUUCGAGCUCUGCAUCA   | 184  |                        |    |          |
| AK366340        | Phosphatase associated protein | 4.0   | miRNA              | 21   | CUAUAACCGCGCCGAGUUAGU  | 1    | ..... : : : : : : : :  | TR |          |
|                 |                                |       | Target             | 1890 | GAUGUUGACGAGGCUC AAGCA | 1910 |                        |    |          |
| AK373446        | Unknown function               | 4.0   | miRNA              | 21   | CUAUAACCGCGCCGAGUUAGU  | 1    | : : : : : : : : : :    | CL |          |
|                 |                                |       | Target             | 1247 | UAGAUUAGCCCCGGCUCAAUCA | 1267 |                        |    |          |
| AK252561        | Unknown function               | 4.0   | miRNA              | 21   | CUAUAACCGCGCCGAGUUAGU  | 1    | ..... : : : : : : .    | CL |          |
|                 |                                |       | Target             | 96   | UUUAUUGGCCCGGCUCGAUCG  | 116  |                        |    |          |

**Additional File 2. Potential targets of hvu-miR171a and b.** psRNATarget (<http://plantgrn.noble.org/psRNATarget>) was used to predict potential targets of hvu-miR171a and b among the full-length barley ESTs assembled by Matsumoto et al 2011 [35]. The maximum score was set at 4. The column “Activity” refers to the type of inhibition predicted, Cleavage (CL) or Translation inhibition (TR).
